# Supplementary material for: Prevalence and Mortality of Sarcopenia in a Community-dwelling Older Japanese Population: The Hisayama Study
Source: PubMed Central journal article supplement (PMC8021883; doi:10.2188/jea.je20190289), 2021-05-05
Supplement: je-31-320-s001.pdf [file je-31-320-s001.pdf]

**eTable 1.** The detailed diagnostic patterns of sarcopenia in the enrolled and excluded groups at the survey in 2012 and in 2017

|                       | Low muscle mass                          | Low muscle function   |                | Diagnosis of sarcopenia | Number of subjects |                |              |
|-----------------------|------------------------------------------|-----------------------|----------------|-------------------------|--------------------|----------------|--------------|
|                       |                                          | Low handgrip strength | Low gait speed |                         | Survey in 2012     | Survey in 2017 |              |
| Enrolled in the study | Yes                                      | Yes                   | Yes            | Sarcopenia              | 18                 | 13             |              |
|                       |                                          |                       | No             |                         | 42                 | 54             |              |
|                       |                                          |                       | Missing        |                         | 29*                | 33*            |              |
|                       |                                          | No                    | Yes            |                         | 12                 | 6              |              |
|                       |                                          |                       | No             |                         | 195                | 223            |              |
|                       |                                          |                       | Missing        |                         | 0                  | 0              |              |
|                       | No                                       | Yes                   | Yes            | Non-sarcopenia          | 19                 | 22             |              |
|                       |                                          |                       | No             |                         | 64                 | 78             |              |
|                       |                                          |                       | Missing        |                         | 29*                | 42*            |              |
|                       |                                          | No                    | Yes            |                         | 39                 | 35             |              |
|                       |                                          |                       | No             |                         | 782                | 916            |              |
|                       |                                          |                       | Missing        |                         | 72*                | 95*            |              |
|                       |                                          | Missing               | Missing        |                         | Yes                | 0              | 0            |
|                       |                                          |                       |                |                         | No                 | 0              | 1*           |
|                       |                                          |                       |                |                         | Missing            | 0              | 0            |
|                       | Missing                                  | No                    | No             | 70*                     | 79*                |                |              |
|                       | <b>Total number of enrolled subjects</b> |                       |                |                         |                    | <b>1,371</b>   | <b>1,597</b> |
|                       | Excluded from the study                  | Yes                   | No             | Missing                 | Unknown            | 16             | 21           |
|                       |                                          |                       | Missing        | No                      |                    | 0              | 0            |
|                       |                                          |                       |                | Missing                 |                    | 0              | 1            |
| Missing               |                                          | Yes                   | Yes            | 15                      |                    | 10             |              |
|                       |                                          |                       | No             | 20                      |                    | 13             |              |

|                                          |         |         |            |            |
|------------------------------------------|---------|---------|------------|------------|
|                                          |         | Missing | 140        | 92         |
|                                          | No      | Yes     | 9          | 4          |
|                                          |         | Missing | 44         | 47         |
|                                          | Missing | Yes     | 0          | 0          |
|                                          |         | No      | 0          | 1          |
|                                          |         | Missing | 247        | 314        |
| <b>Total number of excluded subjects</b> |         |         | <b>491</b> | <b>503</b> |

\* Sarcopenia status was determined using available data for the subjects lacking data for one or more diagnostic items for sarcopenia.

**eTable 2.** Crude and age-specific prevalence of sarcopenia in participants of the survey in 2017, when the usual gait speed was used for the estimation of sarcopenia

|                            | Overall subjects                                      |                     | Men                                                   |                     | Women                                                 |                     |
|----------------------------|-------------------------------------------------------|---------------------|-------------------------------------------------------|---------------------|-------------------------------------------------------|---------------------|
|                            | Subjects with sarcopenia <sup>a</sup> /total subjects | Prevalence (95% CI) | Subjects with sarcopenia <sup>a</sup> /total subjects | Prevalence (95% CI) | Subjects with sarcopenia <sup>a</sup> /total subjects | Prevalence (95% CI) |
| Crude prevalence, %        | 101/1,596 <sup>b</sup>                                | 6.3 (5.2–7.6)       | 37/705 <sup>b</sup>                                   | 5.3 (3.7–7.2)       | 64/891                                                | 7.2 (5.6–9.1)       |
| Age-specific prevalence, % |                                                       |                     |                                                       |                     |                                                       |                     |
| 65–69 years                | 6/507 <sup>b</sup>                                    | 1.2 (0.4–2.6)       | 1/228 <sup>b</sup>                                    | 0.4 (0.1–2.4)       | 5/279                                                 | 1.8 (0.6–4.1)       |
| 70–74 years                | 13/414                                                | 3.1* (1.7–5.3)      | 5/188                                                 | 2.7 (0.9–6.1)       | 8/226                                                 | 3.5 (1.5–6.9)       |
| 75–79 years                | 14/321                                                | 4.4* (2.4–7.2)      | 4/131                                                 | 3.1 (0.8–7.6)       | 10/190                                                | 5.3* (2.6–9.5)      |
| 80–84 years                | 34/223                                                | 15.3* (10.8–20.7)   | 14/106                                                | 13.2* (7.4–21.2)    | 20/117                                                | 17.1* (10.8–25.2)   |
| ≥85 years                  | 34/131                                                | 26.0* (18.7–34.3)   | 13/52                                                 | 25.0* (14.0–39.0)   | 21/79                                                 | 26.6* (17.3–37.7)   |
| <i>p</i> for trend         |                                                       | <0.001              |                                                       | <0.001              |                                                       | <0.001              |

CI, confidence interval.

Values are shown as the crude prevalence (95% CI).

<sup>a</sup> The usual gait speed was used for estimating sarcopenia.

<sup>b</sup> One subject was excluded, due to a lack of sufficient information for determining sarcopenia.

\**p*<0.05 vs. 65–69 years in each group (overall, men, and women).

**eTable 3.** Clinical characteristics for subjects with and without sarcopenia at the survey in 2012

| Variables                                | Non-sarcopenia<br>(n=1,270) | Sarcopenia <sup>a</sup><br>(n=101) | <i>p</i> value |
|------------------------------------------|-----------------------------|------------------------------------|----------------|
| Age, years                               | 73.8 (6.2)                  | 80.0 (7.3)                         | < 0.001        |
| Sex, women, %                            | 56.1                        | 57.4                               | 0.79           |
| Height, cm                               | 154.5 (8.9)                 | 150.8 (8.4)                        | < 0.001        |
| Weight, kg                               | 56.1 (9.9)                  | 46.1 (7.2)                         | < 0.001        |
| BMI, kg/m <sup>2</sup>                   | 23.4 (3.2)                  | 20.2 (2.5)                         | < 0.001        |
| Obesity, %                               | 28.0                        | 3.0                                | < 0.001        |
| Leanness, %                              | 4.9                         | 25.7                               | < 0.001        |
| Living alone, %                          | 9.9                         | 10.9                               | 0.75           |
| Hypertension, %                          | 70.8                        | 71.3                               | 0.91           |
| Diabetes, %                              | 24.9                        | 21.8                               | 0.49           |
| Hypercholesterolemia, %                  | 55.9                        | 47.5                               | 0.13           |
| Serum albumin, g/dL                      | 4.1 (0.2)                   | 4.0 (0.3)                          | < 0.001        |
| History of CVD or cancer, %              | 26.7                        | 36.6                               | 0.06           |
| Cognitive impairment, %                  | 18.7                        | 37.6                               | < 0.001        |
| History of fracture, %                   | 36.4                        | 40.6                               | 0.40           |
| ADL disability, %                        | 4.6                         | 20.8                               | < 0.001        |
| Smoking habits, %                        | 8.3                         | 7.9                                | 0.89           |
| Alcohol intake, %                        | 42.1                        | 29.7                               | 0.02           |
| Regular exercise, %                      | 19.8                        | 7.9                                | 0.004          |
| Total energy intake, kcal/day            | 1,542 (341)                 | 1,400 (270)                        | < 0.001        |
| Energy balance, % of total energy intake |                             |                                    |                |
| Protein, %                               | 12.4 (2.0)                  | 12.0 (1.7)                         | 0.04           |
| Fat, %                                   | 25.3 (5.1)                  | 25.2 (4.6)                         | 0.73           |
| Carbohydrate, %                          | 56.9 (7.3)                  | 58.5 (6.6)                         | 0.03           |

ADL, activities of daily living; BMI, body mass index; CVD, cardiovascular disease.

Values are shown as the means (standard deviations) or frequencies.

<sup>a</sup> The maximum gait speed was used for estimating sarcopenia because the data on usual gait speed was unavailable in the 2012 survey.

**eTable 4.** Risk of all-cause mortality in subjects with compared to those without sarcopenia or its components (adjusted for components of sarcopenia)

|                                                                                          | Model 1                  |                | Model 2                  |                | Model 3                  |                | Model 4                  |                |
|------------------------------------------------------------------------------------------|--------------------------|----------------|--------------------------|----------------|--------------------------|----------------|--------------------------|----------------|
|                                                                                          | Hazard ratio<br>(95% CI) | <i>p</i> value | Hazard ratio<br>(95% CI) | <i>p</i> value | Hazard ratio<br>(95% CI) | <i>p</i> value | Hazard ratio<br>(95% CI) | <i>p</i> value |
| <b><i>Sarcopenia</i><sup>a</sup></b>                                                     |                          |                |                          |                |                          |                |                          |                |
| Absence                                                                                  | 1.00 (reference)         |                | 1.00 (reference)         |                | 1.00 (reference)         |                | 1.00 (reference)         |                |
| Presence                                                                                 | 2.20 (1.25–3.85)         | 0.006          | 3.24 (1.66–6.31)         | <0.001         | 1.45 (0.75–2.78)         | 0.27           | 1.91 (1.02–3.58)         | 0.04           |
| <b>Components of the definition for Sarcopenia</b>                                       |                          |                |                          |                |                          |                |                          |                |
| (Analyses with each component of the definition of sarcopenia as a categorical variable) |                          |                |                          |                |                          |                |                          |                |
| <b><i>Low muscle mass</i></b>                                                            |                          |                |                          |                |                          |                |                          |                |
| Absence                                                                                  | 1.00 (reference)         |                |                          |                | 1.00 (reference)         |                | 1.00 (reference)         |                |
| Presence                                                                                 | 1.10 (0.67–1.80)         | 0.72           |                          |                | 0.85 (0.50–1.43)         | 0.85           | 1.08 (0.63–1.84)         | 0.79           |
| <b><i>Low handgrip strength</i></b>                                                      |                          |                |                          |                |                          |                |                          |                |
| Absence                                                                                  | 1.00 (reference)         |                | 1.00 (reference)         |                |                          |                | 1.00 (reference)         |                |
| Presence                                                                                 | 2.56 (1.55–4.24)         | <0.001         | 2.94 (1.73–5.01)         | <0.001         |                          |                | 1.84 (1.10–3.45)         | 0.02           |
| <b><i>Low gait speed</i><sup>a</sup></b>                                                 |                          |                |                          |                |                          |                |                          |                |
| Absence                                                                                  | 1.00 (reference)         |                | 1.00 (reference)         |                | 1.00 (reference)         |                |                          |                |
| Presence                                                                                 | 2.02 (1.07–3.83)         | 0.03           | 2.08 (1.09–3.95)         | 0.03           | 1.60 (0.82–3.11)         | 0.17           |                          |                |
| (Analyses with each component of the definition of sarcopenia as a continuous variable)  |                          |                |                          |                |                          |                |                          |                |
| <b><i>Each 1SD decrement in SMI</i><sup>b</sup></b>                                      | 0.93 (0.70–1.22)         | 0.58           |                          |                | 0.77 (0.58–1.03)         | 0.08           | 0.94 (0.70–1.28)         | 0.70           |
| <b><i>Each 1SD decrement in handgrip strength</i><sup>b</sup></b>                        | 1.79 (1.28–2.52)         | <0.001         | 2.04 (1.42–2.93)         | <0.001         |                          |                | 1.45 (0.96–2.17)         | 0.08           |
| <b><i>Each 1SD decrement in maximum gait speed</i><sup>b</sup></b>                       | 1.64 (1.22–2.20)         | 0.001          | 1.64 (1.20–2.22)         | 0.002          | 1.47 (1.08–2.04)         | 0.02           |                          |                |

---

ADL, activities of daily living; CI, confidence interval; CVD, cardiovascular disease; SMI, skeletal muscle mass index; SD, standard deviation.

<sup>a</sup> The maximum gait speed was used for estimating sarcopenia and low gait speed because the data on usual gait speed were unavailable in the 2012 survey.

<sup>b</sup> The standard deviations of SMI, handgrip strength, and maximum gait speed were 1.1, 8.3, and 0.4, respectively.

Model 1 was adjusted for age, sex, hypertension, diabetes, history of CVD or cancer, history of fracture, ADL disability, smoking habits, alcohol intake, regular exercise, and total energy intake.

Model 2 was adjusted for the covariates included in model 1 plus SMI.

Model 3 was adjusted for the covariates included in model 1 plus handgrip strength.

Model 4 was adjusted for the covariates included in model 1 plus maximum gait speed.



**eTable 5.** Influence of sarcopenia on all-cause death according to the subgroups of potential risk factors

|                           | Number of events/subjects | Hazard ratio (95% CI) | <i>p</i> for heterogeneity |
|---------------------------|---------------------------|-----------------------|----------------------------|
| Age <75 years             | 26/741                    | 3.89 (1.19–12.69)     | 0.27                       |
| Age ≥75 years             | 57/574                    | 2.47 (1.33–4.58)      |                            |
| Women                     | 31/736                    | 1.67 (0.64–4.34)      | 0.47                       |
| Men                       | 52/579                    | 2.52 (1.23–5.16)      |                            |
| BMI <22 kg/m <sup>2</sup> | 33/491                    | 2.43 (1.08–5.46)      | 0.87                       |
| BMI ≥22 kg/m <sup>2</sup> | 50/824                    | 2.27 (0.88–5.82)      |                            |
| ADL disability (-)        | 73/1,241                  | 2.19 (1.17–4.08)      | 0.90                       |
| ADL disability (+)        | 10/74                     | 1.81 (0.25–13.31)     |                            |

ADL, activities of daily living; BMI, body mass index; CI, confidence interval.

Data were adjusted for age, sex, hypertension, diabetes, history of cardiovascular disease or cancer, history of fracture, ADL disability, smoking habits, alcohol intake, regular exercise, and total energy intake. The variable relevant to the subgroup was excluded from each model.

**eTable 6.** Comparisons of clinical characteristics between the subjects included in and the subjects excluded from the analysis at the 2012 and 2017 surveys

|                              | Included subjects | Excluded subjects | <i>p</i> value between the included and excluded subjects |
|------------------------------|-------------------|-------------------|-----------------------------------------------------------|
| <b><i>Survey in 2012</i></b> |                   |                   |                                                           |
| Number of subjects           | 1,371             | 491               |                                                           |
| Age, years                   | 74.2 (6.5)        | 82.0 (8.1)        | <0.001                                                    |
| Sex, women, %                | 56.2              | 67.2              | <0.001                                                    |
| Cognitive impairment, %      | 20.1              | 51.0              | <0.001                                                    |
| ADL disability, %            | 5.8               | 53.5              | <0.001                                                    |
| <b><i>Survey in 2017</i></b> |                   |                   |                                                           |
| Number of subjects           | 1,597             | 503               |                                                           |
| Age, years                   | 74.1 (6.7)        | 82.0 (8.8)        | <0.001                                                    |
| Sex, women, %                | 55.8              | 63.8              | 0.002                                                     |
| Cognitive impairment, %      | 17.8              | 51.1              | <0.001                                                    |
| ADL disability, %            | 7.6               | 49.9              | <0.001                                                    |

ADL, activities of daily living.

Values are shown as the means (standard deviations) or frequencies.



### A) Survey in 2012

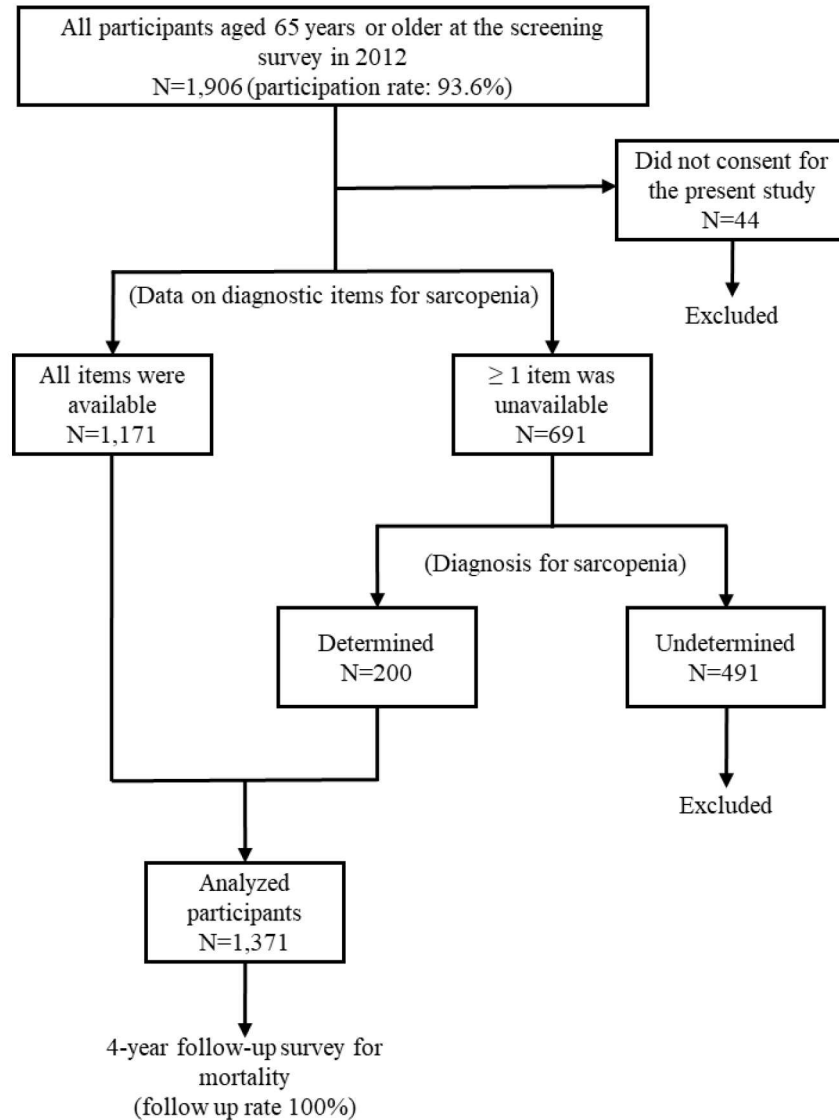

### B) Survey in 2017

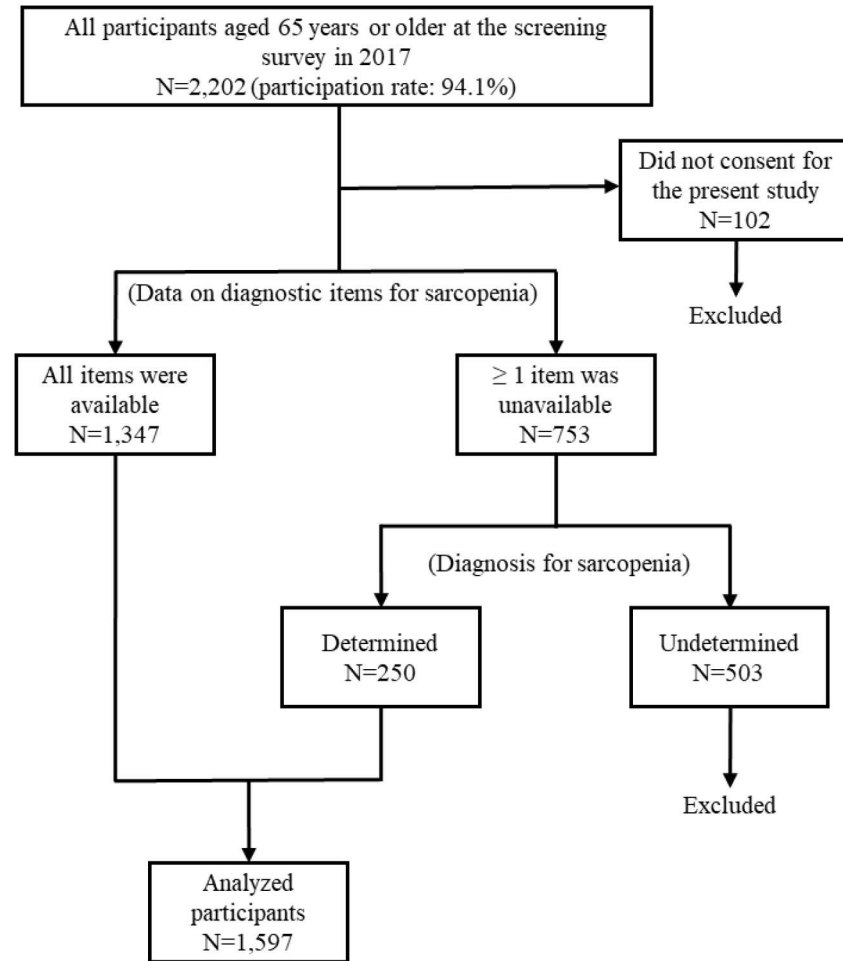

**eFigure 1.** Flow diagram of the enrolled population at survey in 2012 (A) and at survey in 2017 (B)

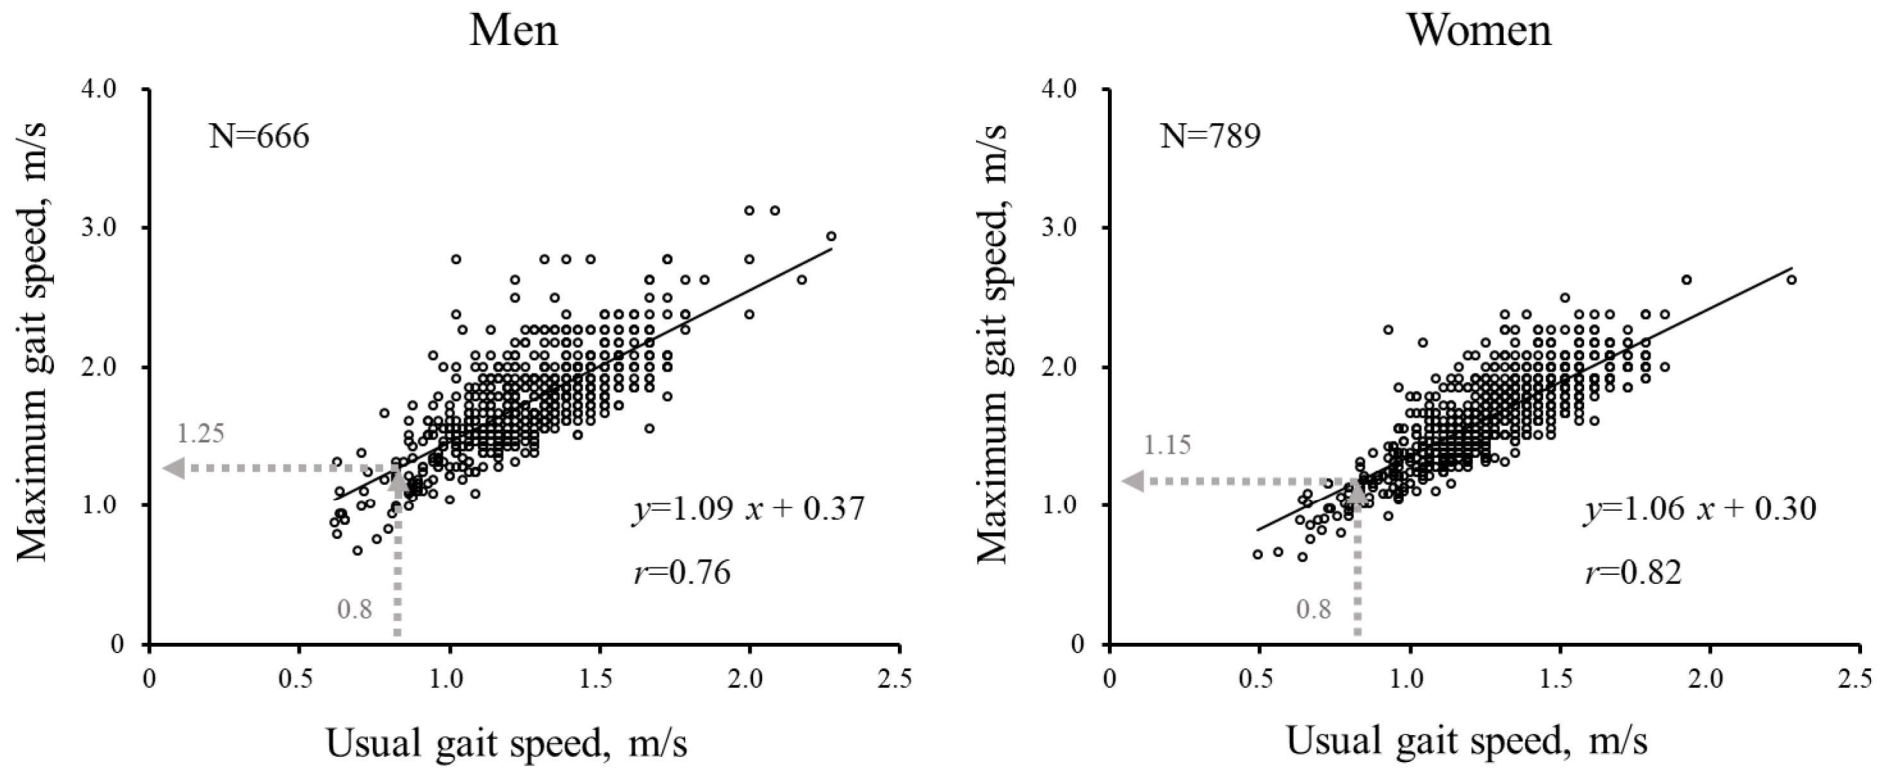

**eFigure 2.** Sex-specific scatter plots of usual gait speed and maximum gait speed, the Hisayama Study, 2017. The black line indicates the linear regression.
